# Supplementary material
Source: HighWire-hosted journal article supplement (https://www.cmajopen.ca/highwire/filestream/81036/field_highwire_adjunct_files/0/open-2016-0012-1-at.pdf)

**Appendix 1 (as supplied by the authors): Questionnaire**

**Knowledge, attitude, willingness, and readiness of primary health care providers  
regarding oral health services to children**

1. Please indicate the type of health practitioner you are:

- a. Family physician/general practitioner
- b. Pediatrician
- c. Nurse Practitioner
- d. Other, please specify: \_\_\_\_\_

2. How many years have you been licensed to practice independently in Canada, e.g., post-residency?

- a. 4 years or fewer
- b. 5-9 years
- c. 10-14 years
- d. 15-19 years
- e. 20+ years

3. Which of the following best describes your primary practice?

- a. Solo
- b. Group

4. Which of the following models best describe your primary practice? (Circle ALL that apply).

- a. Comprehensive Care Model
- b. Community Health Centre
- c. Family Health Group
- d. Family Health Organization
- e. Family Health Network
- f. Family Health Team
- g. Other, please specify: \_\_\_\_\_

5. What professional staff is/are available in your office? (Circle ALL that apply.)

- a. Nurse
  - b. Nurse Practitioner
  - c. Physician Assistant
  - d. Office Manager
  - e. Administrative Staff (e.g. receptionist)
  - f. Other, please specify (e.g. psychiatrist, dietician/nutritionist):
- 

6. What percentage of your practice is made up of children 5 years of age or younger?

- a. 0-5%
- b. 5-10%
- c. 10-25%
- d. 25-50%
- e. 50+%

7. As part of your well child visits for children 5 years of age or younger, do you:

|                                                                | Never | 1-25% patients | 26-50% patients | 51-75% patients | >75% patients |
|----------------------------------------------------------------|-------|----------------|-----------------|-----------------|---------------|
| Visually examine the oral cavity?                              |       |                |                 |                 |               |
| Visually examine the teeth?                                    |       |                |                 |                 |               |
| Determine the child's risk for developing tooth decay?         |       |                |                 |                 |               |
| Advise parents/caregivers on tooth cleaning methods?           |       |                |                 |                 |               |
| Advise parents/caregivers on the use of bottles or sippy cups? |       |                |                 |                 |               |
| Advise parents/caregivers on the use of fluoride toothpaste?   |       |                |                 |                 |               |
| Prescribe fluoride supplements?                                |       |                |                 |                 |               |

8. How often do you see children 5 years of age or younger with tooth decay?

- a. Often
- b. Sometimes
- c. Seldom
- d. Never

9. At what age do you recommend a child see a dentist for their first dental examination? (Circle only ONE.)

- a. Do not recommend a first dental examination to any child
- b. Less than 1 year
- c. 1-2 years
- d. 2-3 years
- e. Over 3 years
- f. Other, please specify: \_\_\_\_\_

10. How often do you formally refer children 5 years of age or younger to dentists?

- a. Often
- b. Sometimes
- c. Seldom
- d. Never

11. When you identify a child with tooth decay in your practice, what steps do you normally take? (Circle ALL that apply.)

- a. Have never seen a child with tooth decay
- b. Do not formally refer children to dentists
- c. Make a note in the medical chart
- d. Advise the parent/caregiver to take the child to a dentist
- e. Give the parent/caregiver the name(s) of a dentist
- f. Make a formal referral to a dentist
- g. Other, please specify:

\_\_\_\_\_

12. Do you ask parents/caregivers if they have dental insurance for their children?

|                                         | Often | Sometimes | Seldom | Never |
|-----------------------------------------|-------|-----------|--------|-------|
| When they present with a dental concern |       |           |        |       |
| Routinely at intake                     |       |           |        |       |
| Routinely at well child visits          |       |           |        |       |

13. Approximately what proportion of the families you see in your practice would experience financial hardship by accessing dental care for their child(ren)?

- a. 0-10%
- b. 10-25%
- c. 25-50%
- d. 50-75%
- e. 75+%

14. Do you think there are enough dentists in your area to treat children?

- a. Yes
- b. No
- c. Don't Know

15. How important is your practice's role in promoting oral health among children?

- a. Very Important
- b. Important
- c. Moderately Important
- d. Of Little Importance
- e. Unimportant

16. Please rate your willingness to do the following:

|                                                                                                | Most Willing |   |   |   | Least willing |
|------------------------------------------------------------------------------------------------|--------------|---|---|---|---------------|
|                                                                                                | 1            | 2 | 3 | 4 | 5             |
| Lift the child's top lip to check for tooth decay.                                             |              |   |   |   |               |
| Advise parents/caregivers regarding prevention measures for tooth decay (e.g. tooth brushing). |              |   |   |   |               |
| Formally refer suspected cases of tooth decay to dental professionals.                         |              |   |   |   |               |
| Obtain more education about prevention measures for tooth decay (e.g. fluoride varnish).       |              |   |   |   |               |
| Implement prevention measures for tooth decay (e.g. fluoride varnish).                         |              |   |   |   |               |

17. Please indicate your level of agreement with the following statements:

|                                                                                                                  | Strongly Agree | Agree | Disagree | Strongly Disagree | Don't Know |
|------------------------------------------------------------------------------------------------------------------|----------------|-------|----------|-------------------|------------|
| Untreated tooth decay could affect the general health of a child.                                                |                |       |          |                   |            |
| Parents should brush their young children's teeth twice a day.                                                   |                |       |          |                   |            |
| The first signs of tooth decay are white spots or lines on the tooth surfaces.                                   |                |       |          |                   |            |
| Baby teeth are important even though they fall out.                                                              |                |       |          |                   |            |
| Community water fluoridation is important for preventing tooth decay.                                            |                |       |          |                   |            |
| Topical fluoride therapies are important for preventing tooth decay.                                             |                |       |          |                   |            |
| Children should have 3 meals and 2-3 snacks per day.                                                             |                |       |          |                   |            |
| Parents should limit juice to 4-6 ounces per day.                                                                |                |       |          |                   |            |
| I feel confident enough to identify tooth decay in children.                                                     |                |       |          |                   |            |
| I feel knowledgeable enough to discuss and counsel parents/caregivers regarding their children's dental hygiene. |                |       |          |                   |            |

18. Of the following, which represent a barrier to you carrying out prevention measures aimed at dental problems? (Circle ALL that apply.)

- a. Lack of clinical time
- b. Lack of office staff to assist in prevention measures
- c. Lack of reimbursement
- d. Lack of parent/caregiver's perceived need for dental care
- e. Lack of knowledge in identifying dental problems
- f. Infants and toddlers are too young and uncooperative for oral examinations
- g. Dentists should perform these activities
- h. Other, please specify:

---

19. What information/resources do you currently use to help in identifying dental problems and preventing tooth decay in children?

- a. Structured well baby/well child charting system (e.g. Rourke Baby Record)
- b. Physician guidelines (e.g. Canadian Pediatric Society position statements)
- c. Local information from my health unit
- d. Recent CME/CPD event(s) or online course(s) on this subject
- e. Other, please specify:

---

20. Would you like more information/resources on identifying dental problems and preventing tooth decay in children?

- a. Yes
- b. No

21. Are water supplies in the Niagara Region fluoridated?

- a. Yes
- b. No
- c. Don't Know

22. Do you have any further comments?

---

---

---

---

---

---

---

---

---

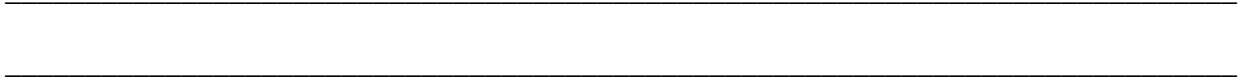

Supplement: open-2016-0012-1-at.pdf [file open-2016-0012-1-at.pdf]
